# Supplementary material for: Wa-1 Equine-Like G3P[8] Rotavirus from a Child with Diarrhea in Colombia
Source: MDPI journal article supplement (doi:10.3390/v13061075), 2021-06-04
Supplement: s1 [file s1]

Supplementary material

# **Wa-1 equine-like G3P[8] rotavirus from a child with diarrhea in Colombia**

**Table S1.** List of Primers used for RVA amplification and sequencing <sup>(1)</sup>.

|                      |                          |                                       |
|----------------------|--------------------------|---------------------------------------|
| <b>VP1 (a+b+c)</b>   | <b>VP1a (1-1164)</b>     |                                       |
|                      | VP1-F-04                 | GGC TAT TAA AGC TRT AC                |
|                      | VP1-2-R                  | CTT GAA GAA GAT GAT CAT CAT GC        |
|                      | <b>VP1b (1142-2786)</b>  |                                       |
|                      | RV-VP1bF                 | TGA AGA CAG AGT ACA CTG AAG ATG       |
|                      | RV-VP1bR                 | ATC CAG TAA TGG CTA CAG ATG TC        |
| <b>VP3 (a+b+c)</b>   | <b>VP1c (2461- 3288)</b> |                                       |
|                      | VP1-F-02                 | GAG GAC AAA GTA CAC AAT GGG           |
|                      | VP1-R-04                 | GGT CAC ATC TAA GCG                   |
|                      | <b>VP3a (1 -1083)</b>    |                                       |
|                      | VP3-F                    | GGC TWT TAA AGC AGT ACY               |
|                      | VP3a-R                   | CCA CTC TTT CCA ATC CAT AT            |
| <b>VP4 (a+b)</b>     | <b>VP3b (714-1797)</b>   |                                       |
|                      | VP3b-F                   | TAT TAA ATT GAA GCA GGA GAA ATG G     |
|                      | VP3b-R                   | ACA TTA GTA CCT ATT AGA TTG AA        |
|                      | <b>VP3c (1410-2573)</b>  |                                       |
|                      | VP3-F-In06               | GAT TAT ATC GTA GCA TTA TAC GC        |
|                      | GEN-VP3R                 | GGY CAC ATC ATG ACT AGT G             |
| <b>VP6 (1-1340)</b>  | <b>VP4a (1-1193)</b>     |                                       |
|                      | VP4-1-a                  | GGC TAT AAA ATG GCT TCG CTC ATT       |
|                      | VP4a-R                   | AAA CAG CGC CAC CAT TCA TTA           |
|                      | <b>VP4b (1082-2338)</b>  |                                       |
|                      | VP4b-F                   | TGG GAT GAT TCA AAA GCA TT            |
|                      | VP4b-R                   | GGT CAC ATC CTC AAT AGC GTT C         |
| <b>VP7 (1-1036)</b>  | GEN-VP6F                 | GGC TTT WAA ACG AAG TCT TC            |
|                      | GEN-VP6R                 | GGT CAC ATC CTC TCA CT                |
| <b>NSP1 (1-1599)</b> | Beg                      | GGC TTT AAA AGA GAG AAT TTC CGT CTG G |
|                      | End                      | GGT CAC ATC ATA CAA TTC TAA TCT AAG   |
| <b>NSP2 (1-1042)</b> | NSP1-F                   | GGC TTT TTT TTG AAA AGT CTT GTG       |
|                      | NSP1-R                   | GGT TCA CAG TTT TTG CTG GCT AGG       |
| <b>NSP3 (1-1050)</b> | GEN-NSP2F                | GGC TTT TAA AGC GTC TCA G             |
|                      | GEN-NSP2R                | GGT CAC ATA AGC GCT TTC               |
| <b>NSP4 (3-741)</b>  | GEN-NSP3F                | GGC TTT TAA TCG TTT TCA GTG           |
|                      | NSP3-R                   | GGT CAC ATA ACG CC CTA TAG C          |
| <b>NSP5 (1-663)</b>  | NSP4-1a                  | GGC TTT TAA AAG TTC TGT TCC G         |
|                      | NSP4-R                   | GGT CAC ATT AAG ACC ATT CCT TCC       |
|                      | NSP5-Beg                 | GGC TTT TAA AGC GCT ACA GTG ATG       |
|                      | NSP5-End                 | GGT CAC AAA ACG GGA GTG GG            |

<sup>1</sup>Primers from: Degiuseppe JI et al., Clin Microbiol Infect. 2013;19(8): E367-71.
